# Supplementary material for: Impact of ozone exposure on the response to glucocorticoid in a mouse model of asthma: involvements of p38 MAPK and MKP-1
Source: Springer Nature journal article supplement (doi:10.1186/s12931-014-0126-x), 2014-10-07
Supplement: MOESM1 [file 9759488]

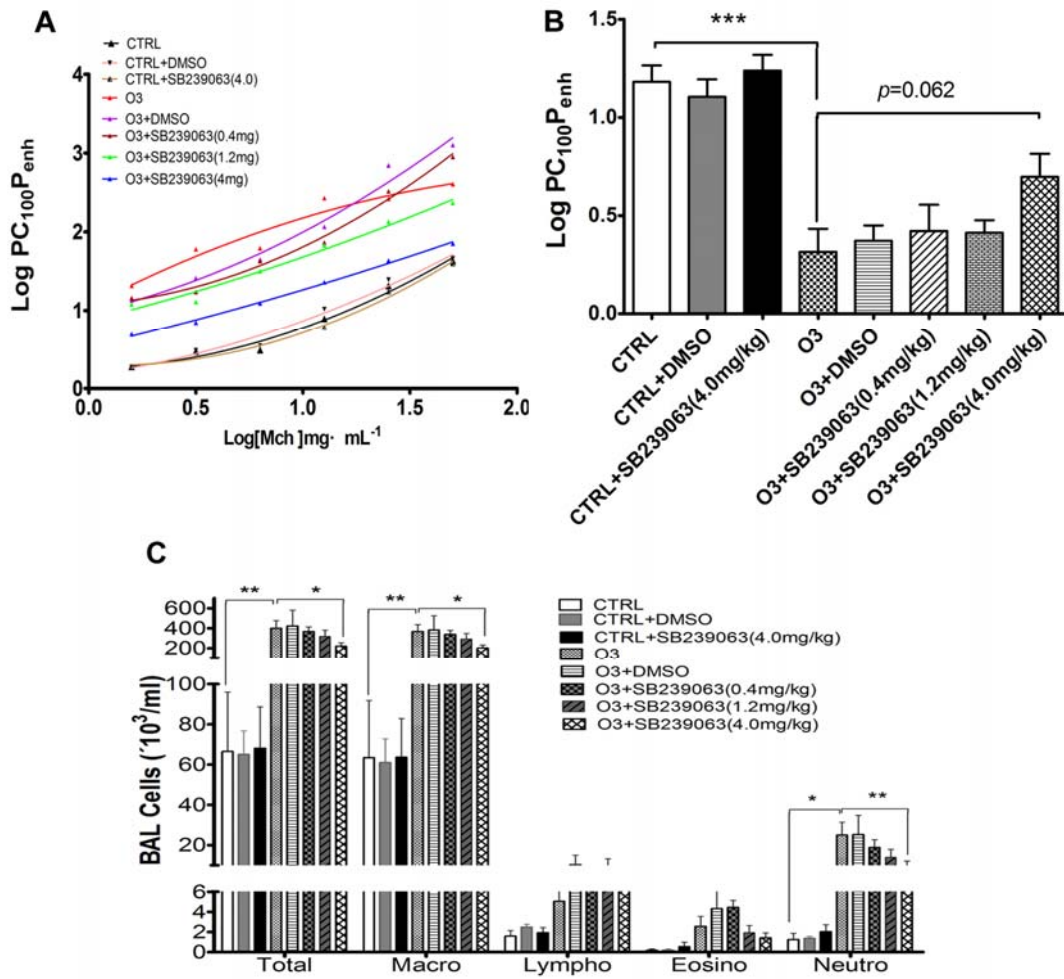

Figure S. **Preliminary experiment for SB239063 dose titration.** Mice were exposed to either 1.0 ppm ozone (O<sub>3</sub>) or filtered air (Ctrl) for three hours, in three every other days. Mice in different group (n=4) received different dose of SB239063(0.4mg/kg; 1.2mg/kg; 4.0mg/kg) or DMSO only, respectively. SB239063 were administrated by injection through tail vein 1hr before and 4hrs after O<sub>3</sub> exposure. 24 hrs after the last exposure mice were measured for AHR and BAL cells. A: mean percentage increase in Penh to increasing provocative concentrations of Mch. B: log provocative concentration of MCh required to increase Penh from baseline to 100% (PC<sub>100</sub>). C: changes in total cells and differential cellularity of BAL. \*:p<0.05; \*\*:p<0.01; \*\*\*: p<0.001; n=4
